# Supplementary material for: Neuronal Dynamics and miRNA Signaling Differ between SH-SY5Y APPSwe and PSEN1 Mutant iPSC-Derived AD Models upon Modulation with miR-124 Mimic and Inhibitor
Source: MDPI journal article supplement (doi:10.3390/cells10092424), 2021-09-14
Supplement: s1 [file s1]

## SUPPLEMENTARY DATA

### Neuronal dynamics and miRNA signaling differ in SH-SY5Y APPSwe and PSEN1 mutant iPSC-derived AD models by miR-124 mimic and inhibitor modulation

#### Cells

Gonalo Garcia <sup>1,2</sup>, Sara Pinto <sup>1,3</sup>, Mar Cunha <sup>1</sup>, Adelaide Fernandes <sup>2,4</sup>, Jari Koistinaho <sup>5,6</sup>, and Dora Brites <sup>1,\*</sup>

<sup>1</sup> Neuroinflammation, Signaling and Neuroregeneration Laboratory, Research Institute for Medicines (iMed.Ulisboa), Faculty of Pharmacy, Universidade de Lisboa, 1649-003 Lisboa, Portugal; ggarcia@campus.ul.pt; sfcporto@campus.ul.pt; mariana.xcf@gmail.com; dbrites@ff.ul.pt

<sup>2</sup> Department of Pharmaceutical Sciences and Medicines, Faculty of Pharmacy, Universidade de Lisboa, 1649-003 Lisboa, Portugal; amaf@ff.ulisboa.pt;

<sup>3</sup> Instituto de Medicina Molecular, Faculdade de Medicina, Universidade de Lisboa, 1649-003 Lisboa, Portugal;

<sup>4</sup> Central Nervous System, Blood and Peripheral Inflammation, Research Institute for Medicines (iMed.Ulisboa), Faculty of Pharmacy, Universidade de Lisboa, 1649-003 Lisboa, Portugal

<sup>5</sup> A.I. Virtanen Institute for Molecular Sciences, University of Eastern Finland, FI-70211 Kuopio, Finland; jari.koistinaho@uef.fi

<sup>6</sup> Neuroscience Center, Helsinki Institute of Life Science (HiLIFE), FI-00014 University of Helsinki, Helsinki, Finland; jari.koistinaho@helsinki.fi

\* Correspondence: dbrites@ff.ul.pt; Tel.: (+351 217946450)

## Supplementary Tables

**Table S1.** Data on the healthy control and the Alzheimer's disease (AD) patient from which induced pluripotent stem cells (iPSCs) were generated and differentiated into iNeurons that we used in this study.

| Alias | Cell line | Sex | Age at biopsy | Mutation genotype                 | APOE genotype           | Health status              | Sample origin | Reprogramming method | Karyotype   | Reference |
|-------|-----------|-----|---------------|-----------------------------------|-------------------------|----------------------------|---------------|----------------------|-------------|-----------|
| CTRL  | Ctrl1     | F   | Adult         | -                                 | $\epsilon 3/\epsilon 3$ | Healthy                    | Skin biopsy   | SeV 1.0              | 46XX Normal | [32,33]   |
| pPSEN | AD3       | F   | 47 y          | <i>PSEN1</i> $\Delta$ E9 deletion | $\epsilon 3/\epsilon 3$ | Pre-symptomatic AD patient | Skin biopsy   | SeV 2.0              | 46XX Normal | [32,33]   |

Apolipoprotein E (*APOE*); iPSC-derived iNeurons from Ctrl1 were designed as iNEU-WT, while those from AD3 were denominated iNEU-PSEN in the present study; F, female; y, years; SeV, Sendai virus.

**Table S2.** Total RNA and protein concentrations in exosomes isolated from SH-WT/SW-SWE and iNEU-WT/iNEU-PSEN neuronal cells.

|  | SH-SY5Y neuroblastoma cells |        | iPSCs-generated iNeurons |           |
|--|-----------------------------|--------|--------------------------|-----------|
|  | SH-WT                       | SW-SWE | iNEU-WT                  | iNEU-PSEN |

|                                      |                 |                 |                     |                    |
|--------------------------------------|-----------------|-----------------|---------------------|--------------------|
| Total RNA<br>(ng/ $\mu$ L)           | 5.79 $\pm$ 0.43 | 5.67 $\pm$ 0.45 | 12.19 $\pm$ 0.45 ** | 19.69 $\pm$ 1.63 # |
| Total Protein<br>( $\mu$ g/ $\mu$ L) | 0.24            | 0.35            | 1.32                | 1.46               |

SH-WT, human SH-SY5Y wild-type (WT) neurons; SH-SWE, human SH-SY5Y neurons transfected with the *APP695 Swedish* mutant protein; iNEU-WT, iNeurons differentiated from human induced pluripotent cells (iPSCs) generated from fibroblasts from a healthy control using specific protocols [32,35]; iNEU-PSEN, iNeurons differentiated from iPSCs of a pre-symptomatic individual carrying the *PSEN1* $\Delta$ E9 mutation. Exosomes were isolated by differential ultracentrifugation as described in Materials and Methods. Total RNA (3 replicates) and protein (3 pooled samples) concentrations are expressed as mean  $\pm$  SEM. \*\*  $p < 0.01$  vs. SH-WT; #  $p < 0.05$  vs. iNEU-WT; two-tailed Student's *t* test.

**Table S3.** - List of primers used for mRNA/miRNA analysis by RT-qPCR.

| <b>miRNAs</b>     | <b>Target sequence</b>                                                   |
|-------------------|--------------------------------------------------------------------------|
| hsa-miR-124-3p    | UAAGGCACGCGGUGAAUGCC                                                     |
| hsa-miR-125b-5p   | UCCCUGAGACCCUAACUUGUGA                                                   |
| hsa-miR-21-5p     | UAGCUUAUCAGACUGAUGUUGA                                                   |
| hsa-miR-146a-5p   | UGAGAACUGAAUCCAUGGGUU                                                    |
| hsa-miR-155-5p    | UUA AUGCUAAUCGUGAUAGGGGU                                                 |
| UniSp6 (spike-in) | (Reference sequence)                                                     |
| U6                | (Reference sequence)                                                     |
| <b>mRNAs</b>      | <b>Primer sequence (5' to 3')</b>                                        |
| <i>APP</i>        | <b>FWD:</b> GCTGGTGGAGACACACATGGCC<br><b>REV:</b> GGATCTGAGCGGCTTTCTTGGG |
| <i>Dynein</i>     | <b>FWD:</b> GCCTCAGTCTCTGTCCCATC<br><b>REV:</b> AAGTCCTGGGGTAAGGTGCT     |
| <i>KIF3A</i>      | <b>FWD:</b> TGGCAGCTAAAATGTGTTGC<br><b>REV:</b> CTGTCTTTGGCCTTGCTTTC     |
| <i>GAPDH</i>      | <b>FWD:</b> CGCTCTCTGCTCCTCCTGTT<br><b>REV:</b> CCATGGTGTCTGAGCGATGT     |
| <i>β-actin</i>    | <b>FWD:</b> ACAGAGCCTCGCCTTTGCCG<br><b>REV:</b> TGGGCCTCGTCGCCACATA      |

hsa, *Homo sapiens*; miR, microRNA; mRNA, messenger RNA; RT-qPCR, real-time quantitative polymerase chain reaction; FWD, forward; REV, reverse; *APP*, amyloid precursor protein coding gene; *KIF3A* kinesin-like protein coding gene; *GAPDH*, glyceraldehyde 3-phosphate dehydrogenase protein coding gene.

**Table S4** – Alterations in cell area after transfection with mock, miR-124-3p inhibitor and mimic in SH-WT and SH-SWE cells.

|               | Cell area ( $\mu\text{m}^2$ ) |                |                |
|---------------|-------------------------------|----------------|----------------|
|               | mock                          | inhibitor      | mimic          |
| <b>SH-WT</b>  | 1037 $\pm$ 213                | 1398 $\pm$ 330 | 961 $\pm$ 294  |
| <b>SH-SWE</b> | 1437 $\pm$ 305                | 1453 $\pm$ 262 | 1133 $\pm$ 189 |

Cells were differentiated, modulated with miR-124 inhibitor and mimic, and their exosomes isolated as described in Material and Methods. Data are mean area  $\pm$  SEM from at least five independent experiments. These cell sizes were used to normalize the MitoTracker fluorescence intensity presented in Figure 3C. SH-WT, human SH-SY5Y wild-type neurons; SH-SWE, human SH-SY5Y neurons transfected with the *APP695 Swedish* mutant protein; No significant differences were found.

**Table S5** – Expression profile of inflammatory-associated miRNAs assessed by RT-qPCR in SH-WT and iNEU-WT cells, as well as in their exosomes, after transfection with miR-124-3p inhibitor and mimic.

|                 | SH-WT cells       |                | iNEU-WT cells     |                |
|-----------------|-------------------|----------------|-------------------|----------------|
|                 | miR-124 inhibitor | miR-124 mimic  | miR-124 inhibitor | miR-124 mimic  |
| <b>miR-125b</b> | 0.39 ± 0.21 *     | 5.25 ± 1.14 ** | 0.3 ± 0.23 *      | 2.55 ± 2.28    |
| <b>miR-21</b>   | 0.86 ± 1.04       | 9.35 ± 3.21 *  | 3.56 ± 0.83 **    | 1.13 ± 0.09    |
| <b>miR-146a</b> | 1.63 ± 0.49 *     | 0.36 ± 0.34 #  | 0.56 ± 0.34       | 0.14 ± 0.2 **  |
| <b>miR-155</b>  | 4.6 ± 3.12 *      | 0.64 ± 0.52    | 0.35 ± 0.05 **    | 0.03 ± 0.01 ** |

Cells were differentiated, modulated with miR-124 inhibitor and mimic, and their exosomes isolated as described in

|                 | SH-WT exosomes    |                | iNEU-WT exosomes  |                |
|-----------------|-------------------|----------------|-------------------|----------------|
|                 | miR-124 inhibitor | miR-124 mimic  | miR-124 inhibitor | miR-124 mimic  |
| <b>miR-125b</b> | 0.31 ± 0.1 ##     | 4.33 ± 1.23 ** | 0.44 ± 0.05 **    | 2.27 ± 0.54 ** |
| <b>miR-21</b>   | 0.64 ± 0.24 #     | 6 ± 2.28 **    | 0.37 ± 0.1 *      | 2.04 ± 0.65 *  |
| <b>miR-146a</b> | 0.61 ± 0.45       | 1.98 ± 0.38 #  | 0.59 ± 0.2 #      | 3 ± 0.43 **    |
| <b>miR-155</b>  | 9.88 ± 1.1 **     | 0.22 ± 0.37 ## | 3.03 ± 0.09 **    | 0.37 ± 0.39 ## |

Material and Methods. Data are mean ± SEM fold-change from at least three independent experiments. \*  $p < 0.05$  and \*\*  $p < 0.01$  vs. respective mock controls; One-way ANOVA with Bonferroni post hoc test. #  $p < 0.05$  and ##  $p < 0.01$  vs. respective mock controls; two-tailed Student's  $t$  test. SH-WT, human SH-SY5Y wild-type neurons; SH-SWE, human SH-SY5Y neurons transfected with the *APP695 Swedish* mutant protein; iNEU-WT, iNeurons differentiated from human induced pluripotent cells (iPSCs) generated from fibroblasts from a healthy control using specific protocols [32,35]; iNEU-PSEN, iNeurons differentiated from iPSCs of a pre-symptomatic individual carrying the *PSEN1ΔE9* mutation.

## Supplementary Figures

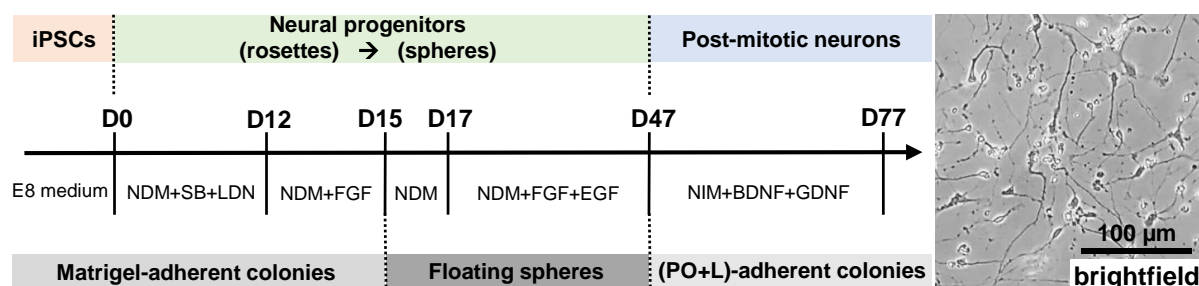

**Figure S1.** Schematic representation for the differentiation of induced Pluripotent Stem Cells (iPSCs) into induced neurons (iNeurons), following specific protocols [32,35], as described in Materials and Methods. Essential 8™ medium (E8 medium; Thermo Fischer Scientific) was firstly used for growth and expansion of iPSCs after plating on Matrigel-coated plates, as described in Material and Methods section. Differentiation was initiated by replacing the medium to neural differentiation medium (NDM) containing SB431542 (SB) and LDN193189 (LDN) until day 12. Then, the medium was changed to NDM containing fibroblast growth factor (FGF) until day 15 to expand rosettes, and to NDM alone until day 17, to allow neural progenitor sphere formation. After that, we used NDM with FGF and epidermal growth factor (EGF) until day 47. Cells were plated in Poly-L-Ornithine + Laminin (PO+L) and differentiated with neuron induction medium (NIM) containing brain-derived neurotrophic factor (BDNF) and glial cell line-derived neurotrophic factor (GDNF) until D77. The process was monitored using brightfield microscopy, as represented by the image obtained prior to experiments.

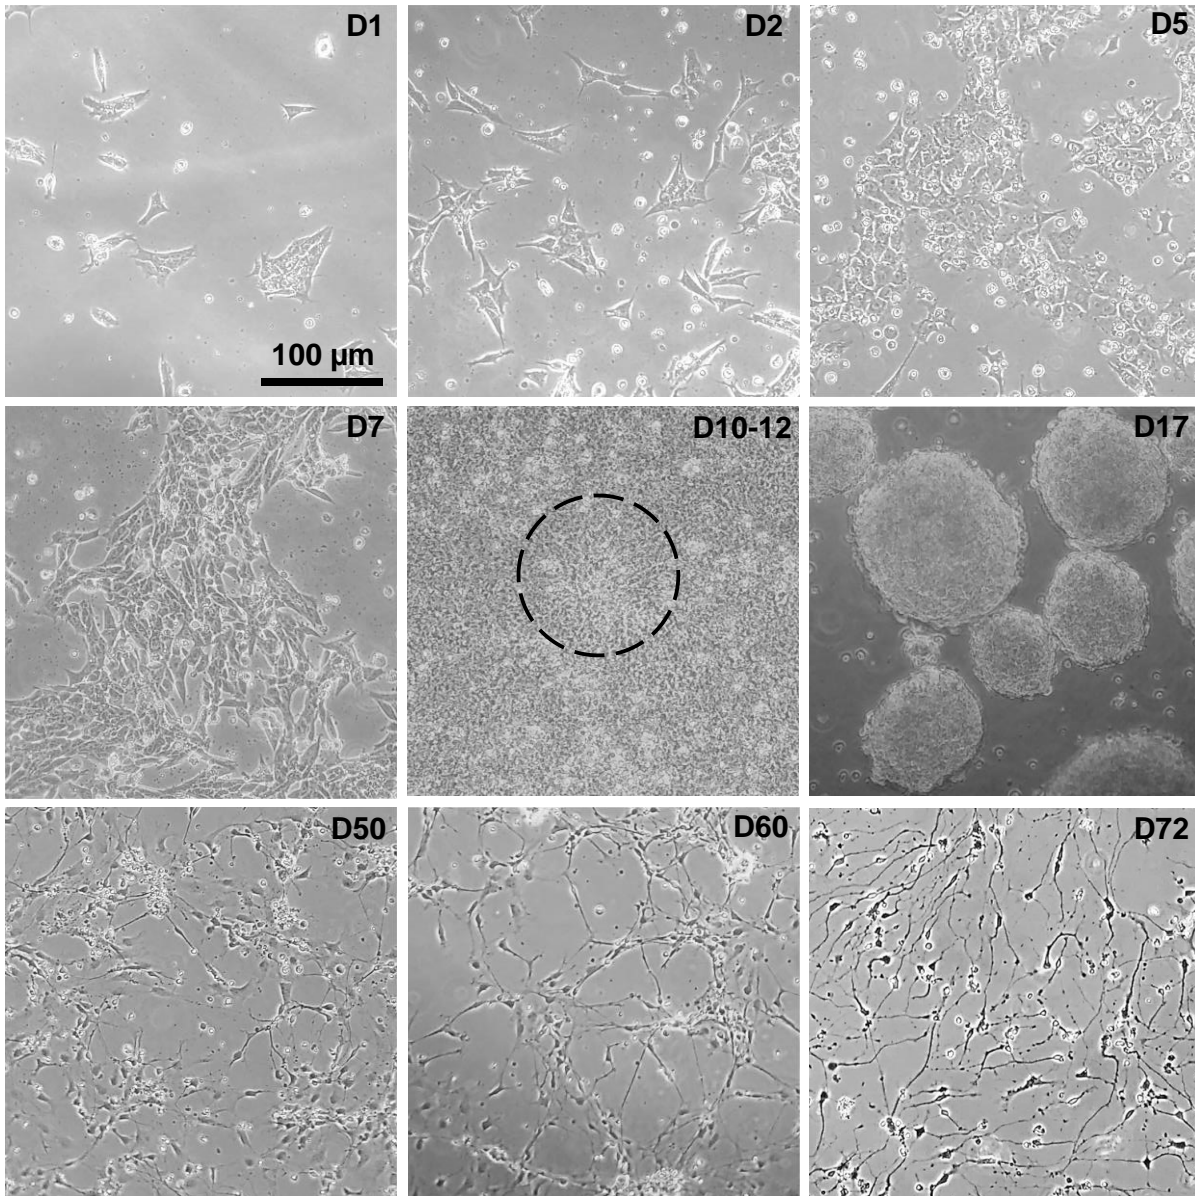

**Figure S2.** Representative brightfield images of the sequential differentiation steps according to the schematic protocol in the Supplementary Figure S1, and as described in Material and Methods. First, we originate the growth and expansion of induced pluripotent stem cells (D1, day one; D2, day two; D5, day five; and D7, day seven), followed by the sequential formation and expansion of rosettes (dashed circle) from D10 to D12, before cell detachment to form neurospheres (D12). Neurospheres were maintained and expanded until D47, when they were dissociated, plated into Poly-L-Ornithine + Laminin-coated plates and matured with brain-derived neurotrophic factor (BDNF) and glial cell line-derived neurotrophic factor (GDNF) until D77.

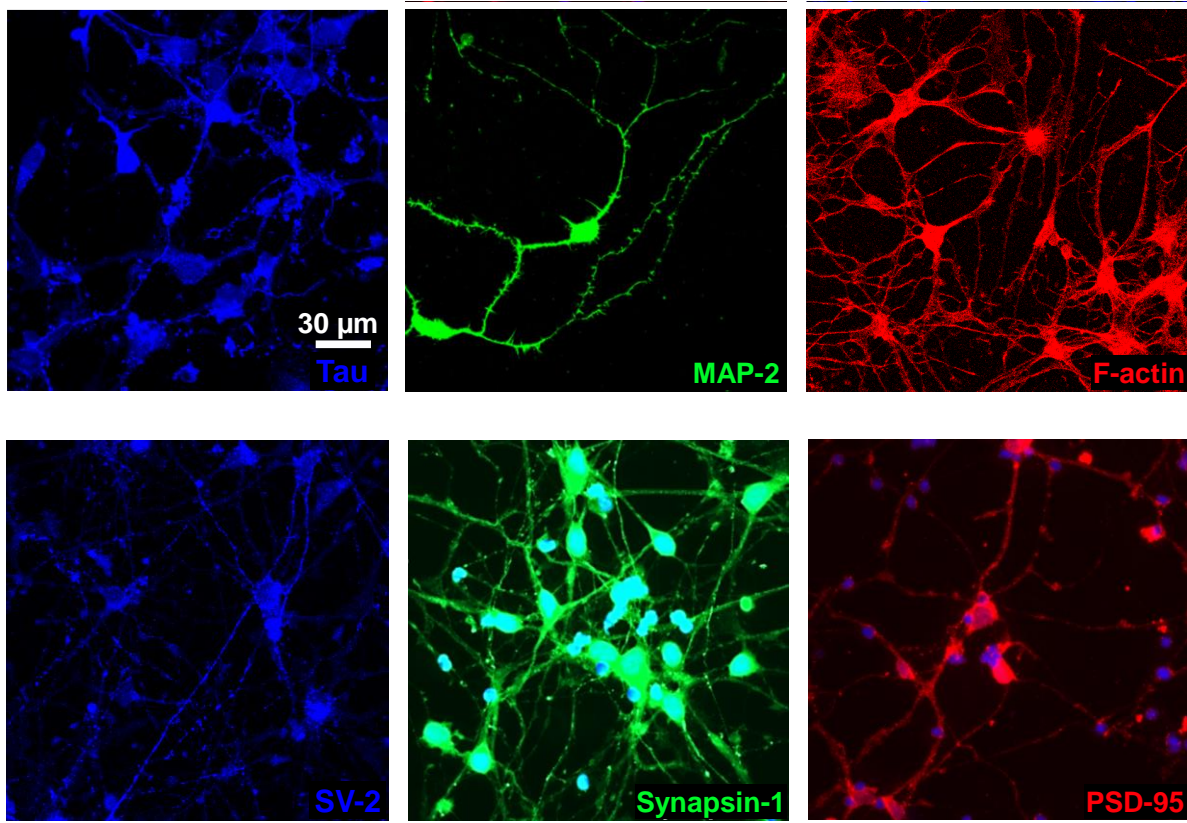

**Figure S3.** Representative fluorescence microscopy images of cytoskeletal and synaptic proteins in induced neurons (iNeurons) differentiated from Induced Pluripotent Stem Cells (iPSCs) and matured following specific protocols [32,35], as described in Materials and Methods. After day 77, neuronal cells display a branching morphology (Supplementary Figure S1, brightfield image) and express the microtubule-associated proteins Tau and MAP-2, as well as the cytoskeleton-associated F-actin patterns in dendrites and axons. Expression of the pre-synaptic markers, synaptic vesicle-2 (SV-2) and synapsin-1, together with the post-synaptic density-95 (PSD-95) marker, are in conformity with iNeuron synaptic maturation.



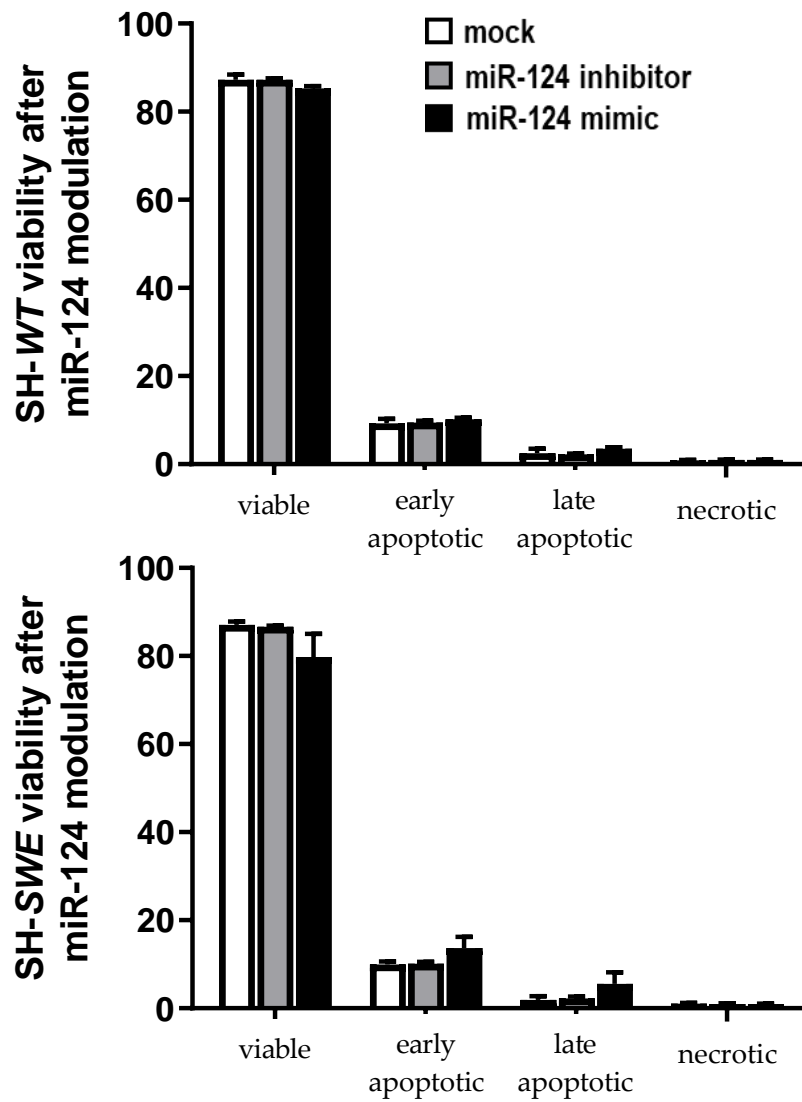

**Figure S4.** Modulation of miR-124 with inhibitor (anti-miR-124-3p) and mimic (pre-miR-124-3p) does not influence viability of SH-WT and SH-SWE cells, relatively to transfected mock control. Cell viability was assessed as described in Materials and Methods by flow cytometry analysis. Four cell populations were distinguished: viable (V-PE and 7-AAD double-negative), early apoptotic (V-PE positive and 7-AAD negative), late apoptotic (V-PE and 7-AAD double-positive), and necrotic cells/cellular debris (V-PE negative and 7-AAD positive). Data are shown as the mean percentage ( $\pm$  SEM), from at least three independent experiments. SH-WT, human SH-SY5Y wild-type neurons; SH-SWE, human SH-SY5Y neurons transfected with the *APP(695) Swedish* mutant protein.

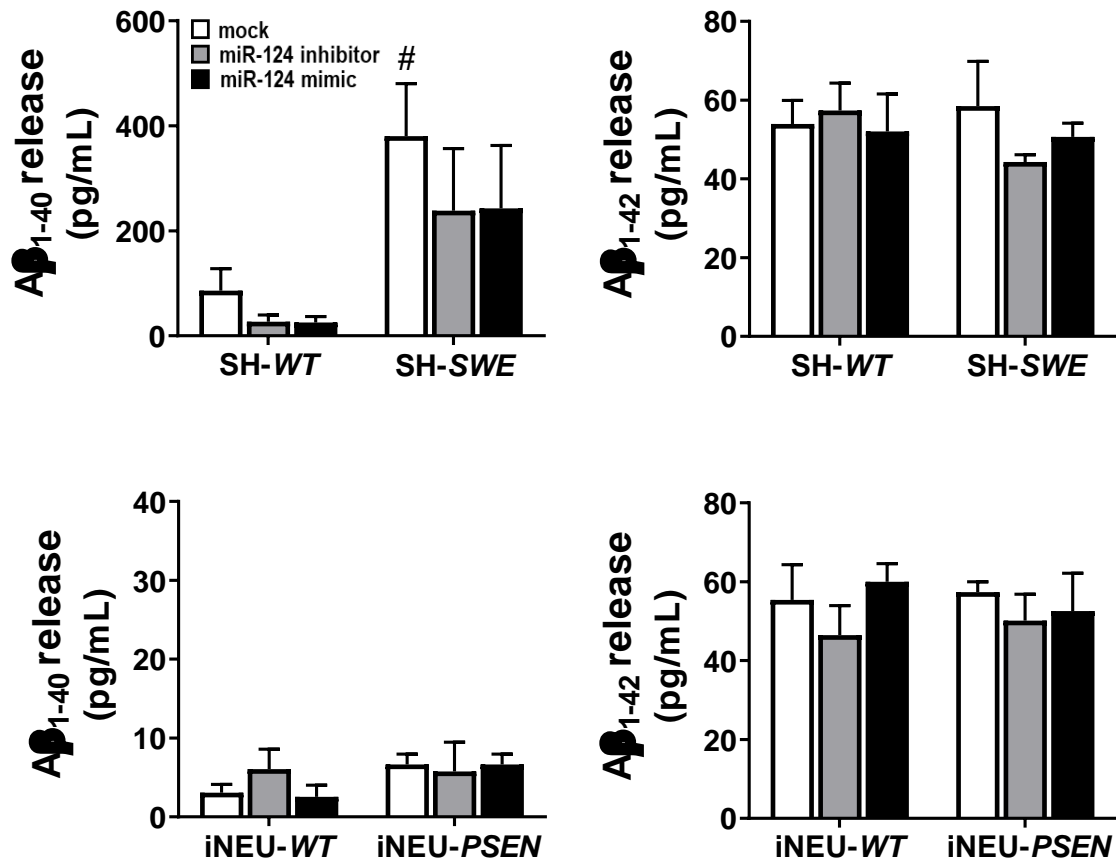

**Figure S5.** Levels of amyloid-beta peptide (Aβ)1-40 and Aβ1-42 in the secretome of differentiated SH-WT/SWE and iNEU-WT/PSEN cells, before and after miR-124 modulation with inhibitor and mimic, as described in Materials and Methods. Results of at least three independent experiments are shown as mean ± SEM fold-change vs. SH-WT cells. # p < 0.05 (two-tailed Student's *t* test). SH-WT, human SH-SY5Y wild-type neurons; SH-SWE, human SH-SY5Y neurons transfected with the *APP695 Swedish* mutant protein; iNEU-WT, iNeurons differentiated from human induced pluripotent cells (iPSCs) generated from fibroblasts from a healthy control using specific protocols [32,35]; iNEU-PSEN, iNeurons differentiated from iPSCs of a pre-symptomatic individual carrying the *PSEN1ΔE9* mutation.
